# Supplementary material for: DEPTH2: an mRNA-based algorithm to evaluate intratumor heterogeneity without reference to normal controls
Source: Springer Nature journal article supplement (doi:10.1186/s12967-022-03355-1), 2022-04-01

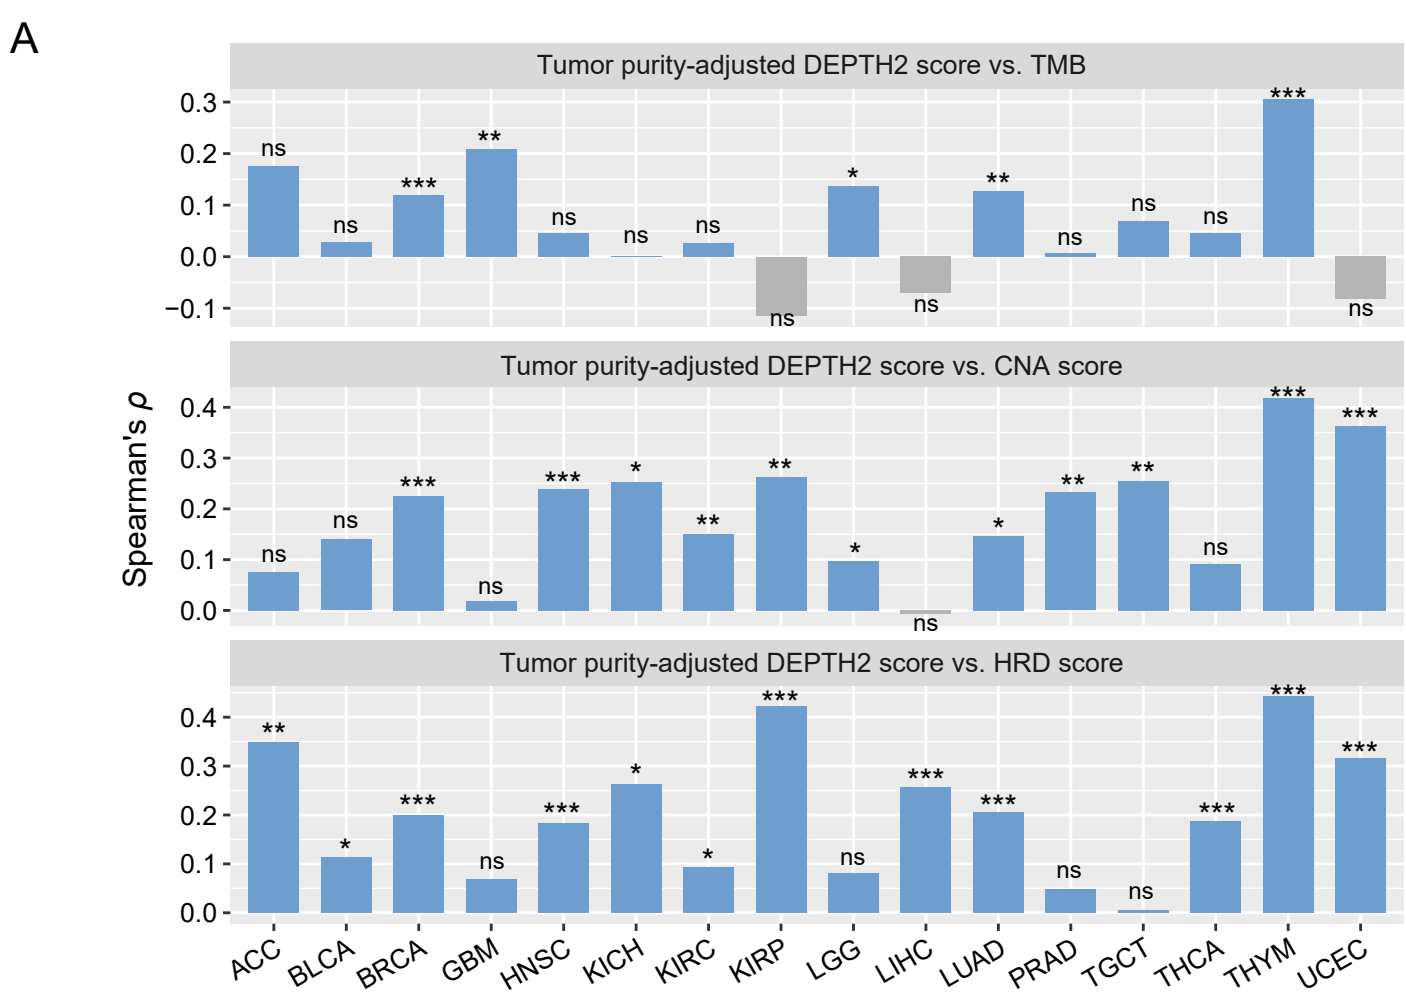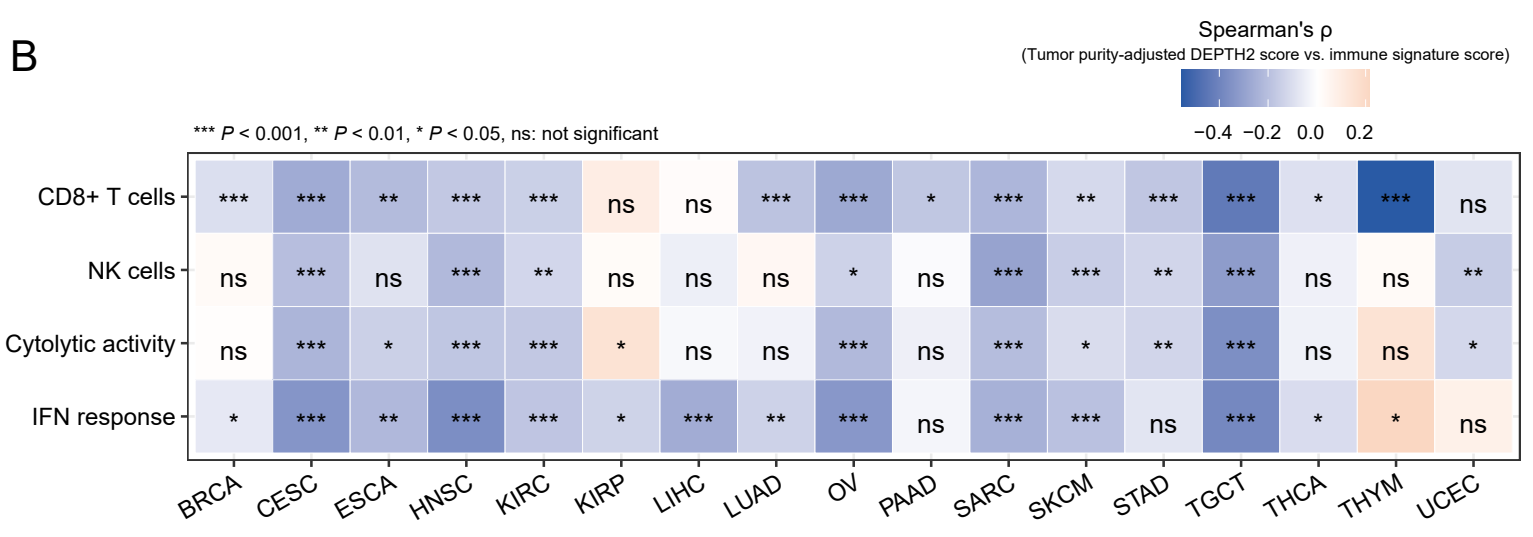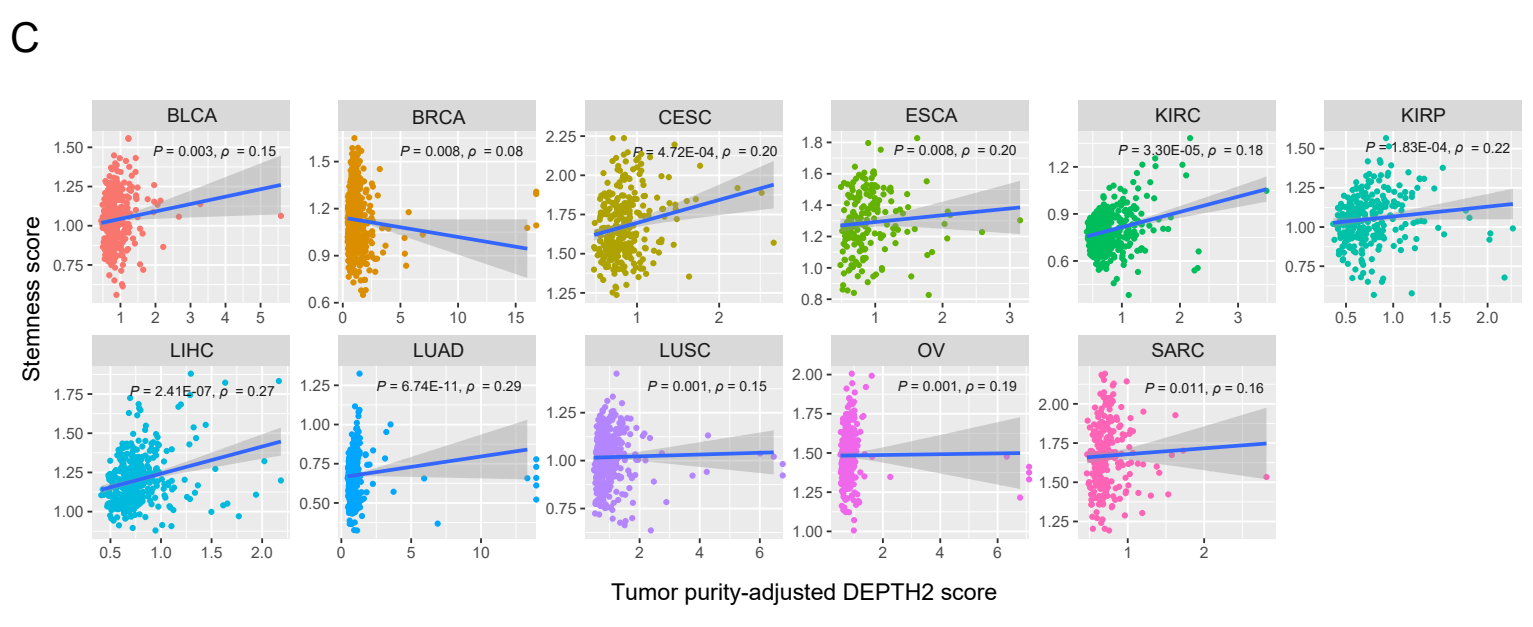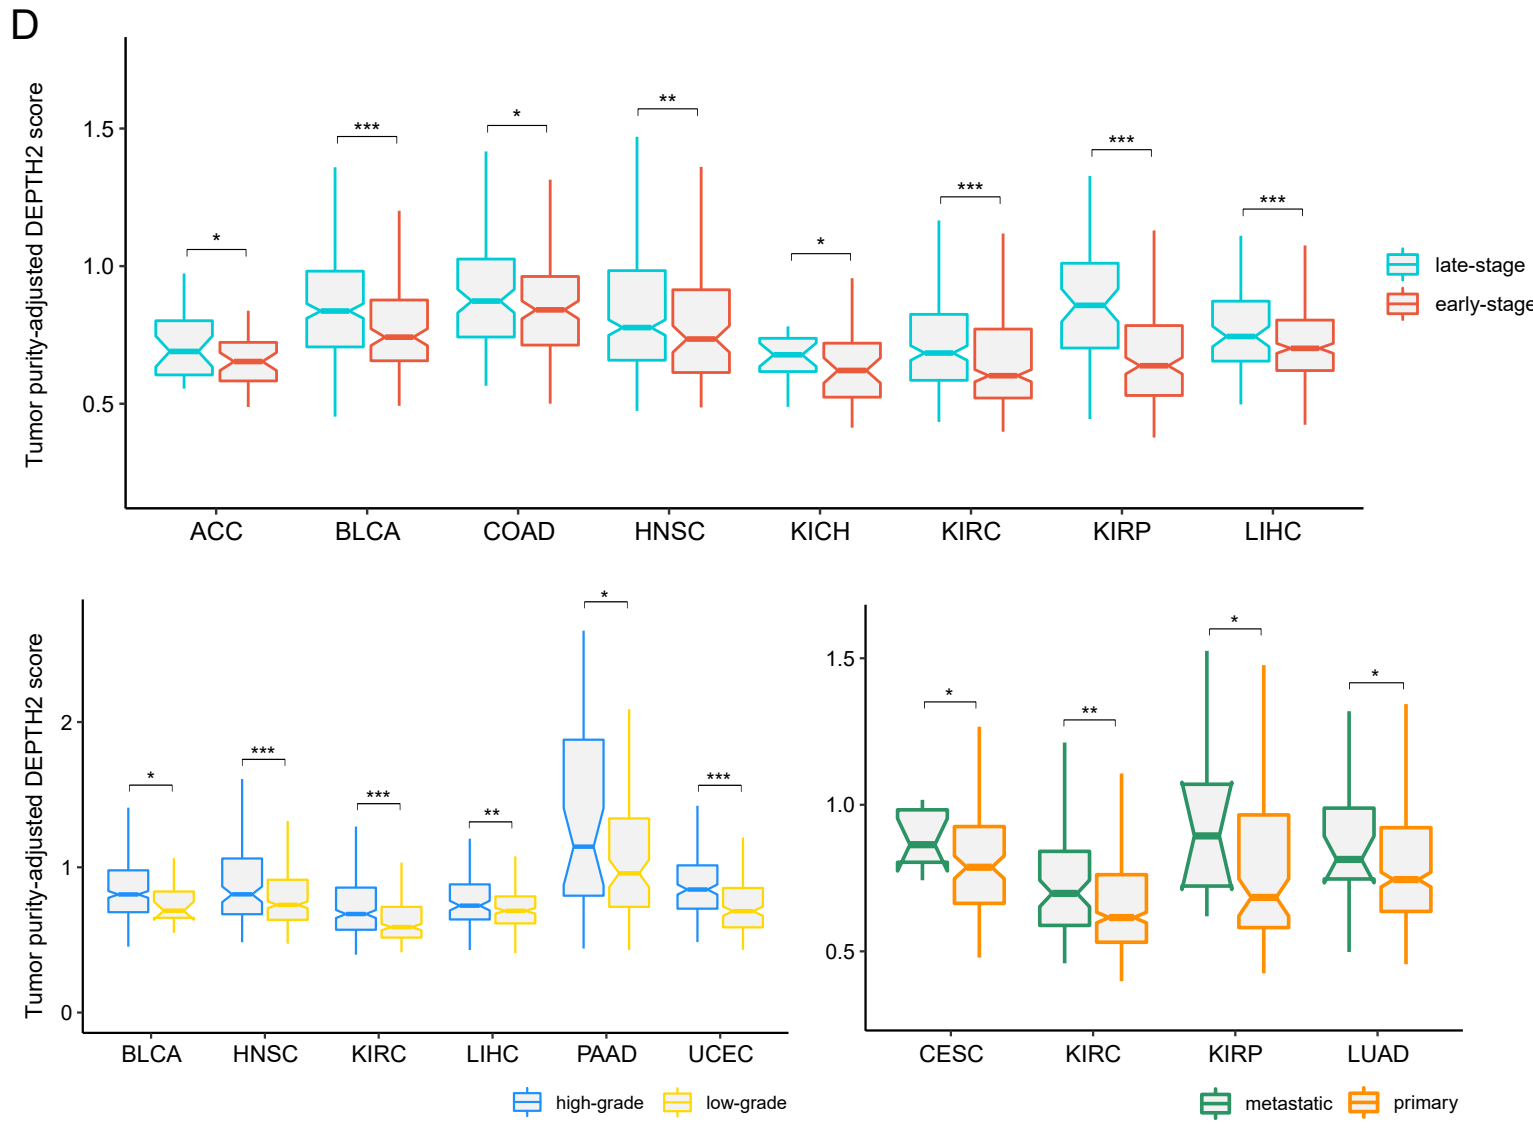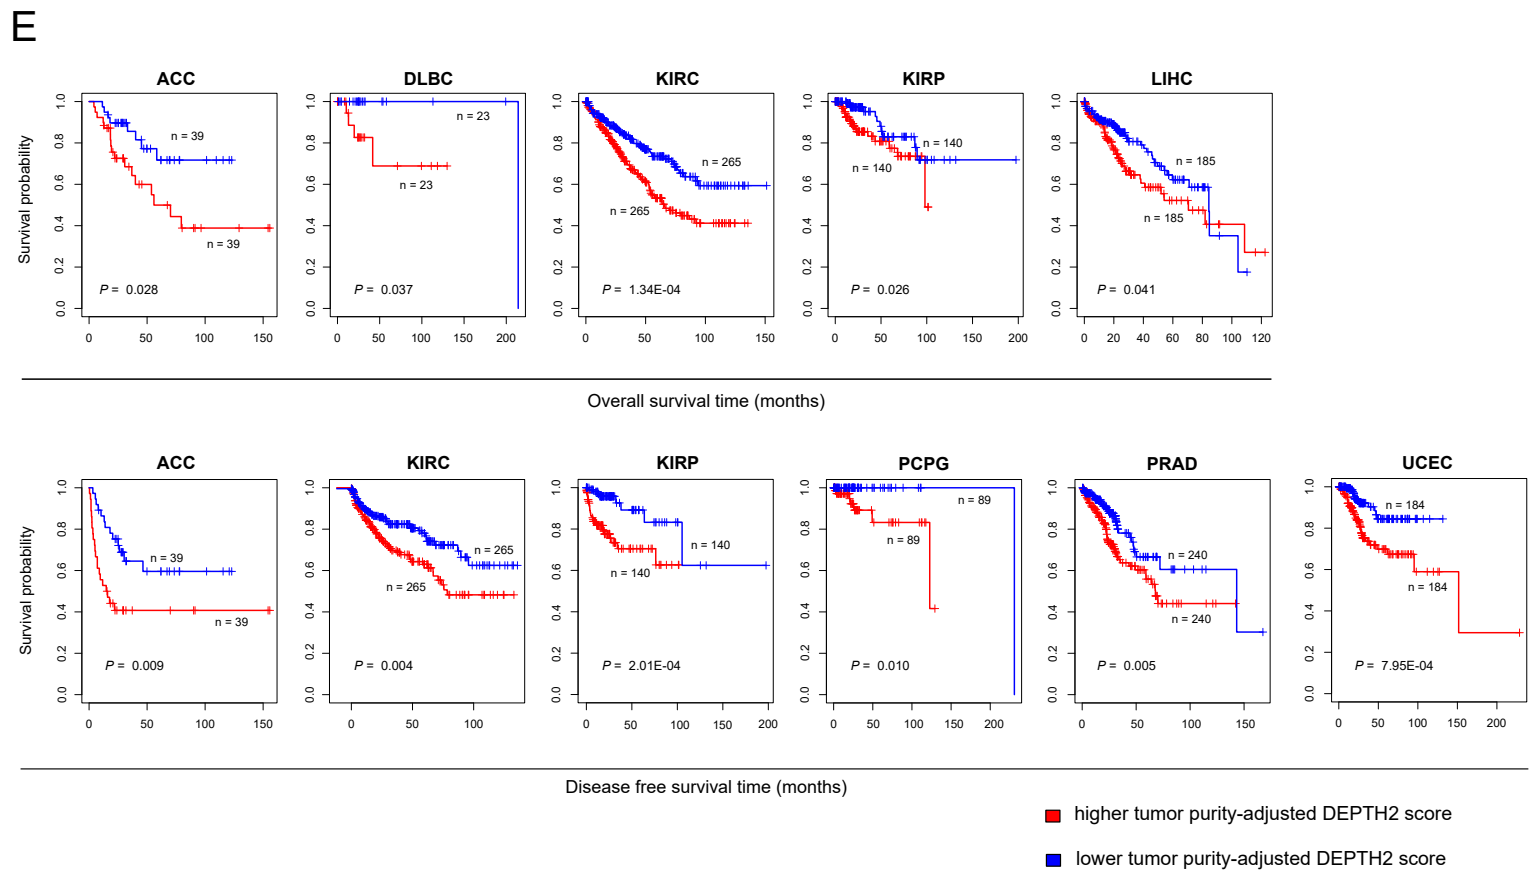

Supplement: MOESM3 [file 20275450]
