# Supplementary material for: DEPTH2: an mRNA-based algorithm to evaluate intratumor heterogeneity without reference to normal controls
Source: J Transl Med. 2022 Apr 1;20:150. doi: 10.1186/s12967-022-03355-1 (PMC8974098; doi:10.1186/s12967-022-03355-1)
Supplement: Supplementary file 1 — Additional file 1: Table S1. A summary of the datasets used in this study. Table S2. The marker or pathway genes of immune signatures, stemness, and pathways. Table S3. Proteins with significant expression correlations with DEPTH2 scores in at least 5 cancer types. Table S4. Spearman correlations between DEPTH2 score and drug sensitivity (IC50 values) of cancer cell lines to 265 compounds. Table S5. Correlations between ITH scores inferred by six different algorithms within individual cancer types. [file 12967_2022_3355_MOESM1_ESM.xlsx]

## Sheet: Table S1
Table S1. A summary of the datasets used in this study
Discovery datasets
Cancer type	Dataset ID	Number of tumor samples	Number of normal samples	Sources
adrenocortical carcinoma	TCGA-ACC	79	128	TCGA(https://portal.gdc.cancer.gov/), GTEx(https://gtexportal.org/home/)
bladder urothelial carcinoma	TCGA-BLCA	408	19	TCGA(https://portal.gdc.cancer.gov/)
breast invasive carcinoma	TCGA-BRCA	1100	112	TCGA(https://portal.gdc.cancer.gov/)
cervical squamous cell carcinoma and endocervical adenocarcinoma	TCGA-CESC	306	10	TCGA(https://portal.gdc.cancer.gov/), GTEx(https://gtexportal.org/home/)
cholangiocarcinoma	TCGA-CHOL	36	9	TCGA(https://portal.gdc.cancer.gov/)
colon adenocarcinoma	TCGA-COAD	287	41	TCGA(https://portal.gdc.cancer.gov/)
lymphoid neoplasm diffuse large B-cell lymphoma	TCGA-DLBC	48	444	TCGA(https://portal.gdc.cancer.gov/), GTEx(https://gtexportal.org/home/)
esophageal carcinoma	TCGA-ESCA	185	11	TCGA(https://portal.gdc.cancer.gov/)
glioblastoma multiforme	TCGA-GBM	166	5	TCGA(https://portal.gdc.cancer.gov/)
head and neck squamous cell carcinoma	TCGA-HNSC	522	44	TCGA(https://portal.gdc.cancer.gov/)
kidney chromophobe	TCGA-KICH	66	25	TCGA(https://portal.gdc.cancer.gov/)
kidney renal clear cell carcinoma	TCGA-KIRC	534	72	TCGA(https://portal.gdc.cancer.gov/)
kidney renal papillary cell carcinoma	TCGA-KIRP	291	32	TCGA(https://portal.gdc.cancer.gov/)
acute myeloid leukemia	TCGA-LAML	173	338	TCGA(https://portal.gdc.cancer.gov/), GTEx(https://gtexportal.org/home/)
brain lower grade glioma	TCGA-LGG	530	1141	TCGA(https://portal.gdc.cancer.gov/), GTEx(https://gtexportal.org/home/)
liver hepatocellular carcinoma	TCGA-LIHC	373	50	TCGA(https://portal.gdc.cancer.gov/)
lung adenocarcinoma	TCGA-LUAD	517	59	TCGA(https://portal.gdc.cancer.gov/)
lung squamous cell carcinoma	TCGA-LUSC	501	51	TCGA(https://portal.gdc.cancer.gov/)
mesothelioma	TCGA-MESO	87	NA	TCGA(https://portal.gdc.cancer.gov/)
ovarian serous cystadenocarcinoma	TCGA-OV	307	89	TCGA(https://portal.gdc.cancer.gov/), GTEx(https://gtexportal.org/home/)
pancreatic adenocarcinoma	TCGA-PAAD	179	168	TCGA(https://portal.gdc.cancer.gov/), GTEx(https://gtexportal.org/home/)
pheochromocytoma and paraganglioma	TCGA-PCPG	184	3	TCGA(https://portal.gdc.cancer.gov/)
prostate adenocarcinoma	TCGA-PRAD	498	52	TCGA(https://portal.gdc.cancer.gov/)
rectum adenocarcinoma	TCGA-READ	95	10	TCGA(https://portal.gdc.cancer.gov/)
sarcoma	TCGA-SARC	263	2	TCGA(https://portal.gdc.cancer.gov/)
skin cutaneous melanoma	TCGA-SKCM	472	812	TCGA(https://portal.gdc.cancer.gov/), GTEx(https://gtexportal.org/home/)
stomach adenocarcinoma	TCGA-STAD	415	35	TCGA(https://portal.gdc.cancer.gov/)
testicular germ cell tumors	TCGA-TGCT	156	165	TCGA(https://portal.gdc.cancer.gov/), GTEx(https://gtexportal.org/home/)
thyroid carcinoma	TCGA-THCA	509	59	TCGA(https://portal.gdc.cancer.gov/)
thymoma	TCGA-THYM	120	2	TCGA(https://portal.gdc.cancer.gov/)
uterine corpus endometrial carcinoma	TCGA-UCEC	370	11	TCGA(https://portal.gdc.cancer.gov/)
uterine carcinosarcoma	TCGA-UCS	57	78	TCGA(https://portal.gdc.cancer.gov/), GTEx(https://gtexportal.org/home/)
uveal melanoma	TCGA-UVM	80	NA	TCGA(https://portal.gdc.cancer.gov/)
Pan-cancer	TCGA-Pan-cancer	11069	NA	UCSC(https://xenabrowser.net/datapages/)
Validation datasets
Cancer type	Dataset ID	Number of tumor samples	Sources
bladder urothelial carcinoma	BLCA-GSE13507	165	GEO (GSE13507) (https://www.ncbi.nlm.nih.gov/geo/)
breast invasive carcinoma	BRCA-E-MTAB-6703	2088	ArrayExpress (GSE3744, GSE19615, GSE21653, GSE12276, GSE26639, GSE9195, GSE23177, GSE23593, GSE16446, GSE20685, GSE20711, GSE7904, GSE18864, GSE42568, GSE50567, GSE28821, GSE5764, GSE10780, GSE22513, GSE28796) (https://www.ebi.ac.uk/arrayexpress/)
breast invasive carcinoma	BRCA-METABRIC	1980	cBioPortal (METABRIC)(https://www.cbioportal.org/)
cervical squamous cell carcinoma and endocervical adenocarcinoma	CESC-GSE26511	39	GEO (GSE26511) (https://www.ncbi.nlm.nih.gov/geo/)
cervical squamous cell carcinoma and endocervical adenocarcinoma	CESC-GSE44001	300	GEO (GSE44001) (https://www.ncbi.nlm.nih.gov/geo/)
cholangiocarcinoma	CHOL-GSE32225	149	GEO (GSE32225) (https://www.ncbi.nlm.nih.gov/geo/)
esophageal carcinoma	ESCA-GSE69925	274	GEO (GSE69925) (https://www.ncbi.nlm.nih.gov/geo/)
glioblastoma multiforme	GBM-CGGA693	693	CGGA (mRNAseq_693) (http://www.cgga.org.cn/)
glioblastoma multiforme	GBM-GSE16011	276	GEO (GSE16011) (https://www.ncbi.nlm.nih.gov/geo/)
head and neck squamous cell carcinoma	HNSC-GSE65858	270	GEO (GSE65858) (https://www.ncbi.nlm.nih.gov/geo/)
kidney renal clear cell carcinoma	KIRC-E-MTAB-6692	219	ArrayExpress (GSE36895, GSE23629, GSE11151, GSE53757, GSE12606, GSE12090) (https://www.ebi.ac.uk/arrayexpress/)
kidney renal clear cell carcinoma	KIRC-GSE40435	101	GEO (GSE40435) (https://www.ncbi.nlm.nih.gov/geo/)
acute myeloid leukemia	LAML-GSE15061	404	GEO (GSE15061) (https://www.ncbi.nlm.nih.gov/geo/)
liver hepatocellular carcinoma	LIHC-GSE14520	226	GEO (GSE14520) (https://www.ncbi.nlm.nih.gov/geo/)
liver hepatocellular carcinoma	LIHC-GSE25097	268	GEO (GSE25097) (https://www.ncbi.nlm.nih.gov/geo/)
lung adenocarcinoma	LUAD-GSE68465	462	GEO (GSE68465) (https://www.ncbi.nlm.nih.gov/geo/)
lung adenocarcinoma	LUAD-GSE71181	284	GEO (GSE71181) (https://www.ncbi.nlm.nih.gov/geo/)
lung adenocarcinoma	LUAD-GSE72094	442	GEO (GSE72094) (https://www.ncbi.nlm.nih.gov/geo/)
lung cancer	LUNG-E-MTAB-6699	1414	ArrayExpress (GSE10245, GSE10445, GSE10799, GSE12667, GSE18842, GSE19188, GSE28571, GSE30219, GSE31210, GSE33356, GSE37745, GSE50081) (https://www.ebi.ac.uk/arrayexpress/)
lung squamous cell carcinoma	LUSC-GSE157011	484	GEO (GSE157011) (https://www.ncbi.nlm.nih.gov/geo/)
lung squamous cell carcinoma	LUSC-GSE4573	130	GEO (GSE4573) (https://www.ncbi.nlm.nih.gov/geo/)
ovarian serous cystadenocarcinoma	OV-E-MTAB-6691	587	ArrayExpress (GSE9899, GSE10971, GSE14001, GSE14407, GSE18520, GSE19352, GSE15578, GSE12172, GSE19829, GSE30161) (https://www.ebi.ac.uk/arrayexpress/)
pancreatic adenocarcinoma	PAAD-E-MTAB-6690	108	ArrayExpress (GSE15471,GSE16515, GSE22780,GSE32676) (https://www.ebi.ac.uk/arrayexpress/)
pancreatic adenocarcinoma	PAAD-GSE71729	223	GEO (GSE71729) (https://www.ncbi.nlm.nih.gov/geo/)
prostate adenocarcinoma	PRAD-CA	144	ICGC (PRAD-CA) (https://icgc.org/)
prostate adenocarcinoma	PRAD-E-MTAB-6694	121	ArrayExpress (GSE17951, GSE55945, GSE3325, GSE26910, GSE45016, GSE17906) (https://www.ebi.ac.uk/arrayexpress/)
prostate adenocarcinoma	PRAD-GPL96	223	GEO (GSE8218,GSE25136) (https://www.ncbi.nlm.nih.gov/geo/)
sarcoma	SARC-GSE30929	140	GEO (GSE30929) (https://www.ncbi.nlm.nih.gov/geo/)
skin cutaneous melanoma	SKCM-GSE53118	79	GEO (GSE53118) (https://www.ncbi.nlm.nih.gov/geo/)
skin cutaneous melanoma	SKCM-GSE65904	214	GEO (GSE65904) (https://www.ncbi.nlm.nih.gov/geo/)
stomach adenocarcinoma	STAD-ACRG	300	GEO (GSE62254) (https://www.ncbi.nlm.nih.gov/geo/)
stomach adenocarcinoma	STAD-GSE84437	433	GEO (GSE84437) (https://www.ncbi.nlm.nih.gov/geo/)
testicular germ cell tumors	TGCT-GPL96	146	GEO (GSE3218) (https://www.ncbi.nlm.nih.gov/geo/)
uterine corpus endometrial carcinoma	UCEC-GSE17025	91	GEO (GSE17025) (https://www.ncbi.nlm.nih.gov/geo/)
Datasets with cancer immunotherapy
Cancer type	Dataset ID	Number of samples	References
melanoma	Allen cohort	40	Ref. [1]
melanoma	Snyder cohort	21	Ref. [2]
clear cell renal cell carcinoma	Miao cohort	33	Ref. [3]
non-small cell lung carcinoma	Jung cohort	27	Ref. [4]
Dataset for cancer cell lines
Cancer type	Dataset ID	Number of samples	Sources
Pan-cancer	Cancer Cell Line Encyclopedia (CCLE)	1018	GDSC (https://www.cancerrxgene.org)
References
[1] Van Allen et al. Genomic correlates of response to CTLA-4 blockade in metastatic melanoma. Science. 2015 Oct 9; 350(6257): 207-211.
[2] Snyder et al. Genetic Basis for Clinical Response to CTLA-4 Blockade in Melanoma. The new England journal of medicine. 2014 Dec 4; 371(23): 2190-2199.
[3] Diana Miao et al. Genomic correlates of response to immune checkpoint therapies in clear cell renal cell carcinoma.Science. 2018 Feb 16; 359(6377): 801–806.
[4] Jung H, Kim HS, Kim JY, Sun JM et al. DNA methylation loss promotes immune evasion of tumours with high mutation and copy number load. Nat Commun 2019 Sep 19;10(1):4278.

## Sheet: Table S2
Table S2. The marker or pathway genes of immune signatures, stemness, and pathways
CD4+ regulatory T cells	CD8+ T cells	NK cells	Cytolytic activity	IFN response	Stemness	Cell cycle	DNA replication	mTOR signaling pathway	MAPK signaling pathway	PI3K-Akt signaling pathway
CTLA4	CD2	KLRC1	PRF1	DDX4	DNMT3B	CCND1	SSBP1	SLC7A5	CACNA1A	EGF
FOXP3	CD247	KLRF1	GZMA	IFIT1	PFAS	CCND2	RNASEH1	SLC3A2	CACNA1B	TGFA
GPR15	CD28			IFIT2	XRCC5	CCND3	RPA1	SLC38A9	CACNA1C	EREG
IL32	CD3D			IFIT3	HAUS6	CDK4	PCNA	ATP6V1A	CACNA1D	AREG
IL4	CD3E			IRF7	TET1	CDK6	DNA2	ATP6V1B1	CACNA1E	FGF1
IL5	CD3G			ISG20	IGF2BP1	RB1	FEN1	ATP6V1B2	CACNA1F	FGF2
	CD8A			MX1	PLAA	RBL1	LIG1	ATP6V1C2	CACNA1G	FGF3
	ICAM1			MX2	TEX10	RBL2	POLA1	ATP6V1C1	CACNA1H	FGF4
	ITGAL			RSAD2	MSH6	ABL1	POLA2	ATP6V1D	CACNA1I	FGF17
	ITGB2			TNFSF10	DLGAP5	HDAC1	PRIM1	ATP6V1E2	CACNA1S	FGF6
	PTPRC			GPR146	SKIV2L2	HDAC2	PRIM2	ATP6V1E1	CACNA2D1	FGF7
	THY1			SELP	SOHLH2	E2F1	POLD1	ATP6V1F	CACNA2D2	FGF8
				AHR	RRAS2	E2F2	POLD2	ATP6V1G1	CACNA2D3	FGF9
					PAICS	E2F3	POLD3	ATP6V1G3	CACNA2D4	FGF10
					CPSF3	E2F4	POLD4	ATP6V1G2	CACNB1	FGF16
					LIN28B	E2F5	POLE	ATP6V1H	CACNB2	FGF5
					IPO5	TFDP1	POLE2	LAMTOR1	CACNB3	FGF18
					BMPR1A	TFDP2	POLE3	LAMTOR2	CACNB4	FGF20
					ZNF788	GSK3B	POLE4	LAMTOR3	CACNG1	FGF22
					ASCC3	TGFB1	MCM2	LAMTOR4	CACNG2	FGF19
					FANCB	TGFB2	MCM3	LAMTOR5	CACNG3	FGF21
					HMGA2	TGFB3	MCM4	FLCN	CACNG4	FGF23
					TRIM24	SMAD2	MCM5	FNIP1	CACNG5	NGF
					ORC1	SMAD3	MCM6	FNIP2	CACNG6	BDNF
					HDAC2	SMAD4	MCM7	RRAGA	CACNG7	NTF3
					HESX1	MYC	RPA2	RRAGB	CACNG8	NTF4
					INHBE	ZBTB17	RPA4	RRAGC	PRKACA	INS
					MIS18A	CDKN2A	RPA3	RRAGD	PRKACB	IGF1
					DCUN1D5	CDKN2B	RFC1	SESN2	PRKACG	IGF2
					MRPL3	CDKN2C	RFC4	CASTOR1	PRKCA	PDGFA
					CENPH	CDKN2D	RFC2	CASTOR2	PRKCB	PDGFB
					MYCN	CDKN1B	RFC5	MIOS	PRKCG	PDGFC
					HAUS1	CDKN1C	RFC3	SEH1L	GNA12	PDGFD
					GDF3	CDKN1A	RNASEH2A	WDR24	GNG12	CSF1
					TBCE	CCNE1	RNASEH2B	WDR59	PPP3CA	KITLG
					RIOK2	CCNE2	RNASEH2C	SEC13	PPP3CB	FLT3LG
					BCKDHB	CDK2		DEPDC5	PPP3CC	VEGFA
					RAD1	SKP1		NPRL2	PPP3R1	VEGFB
					NREP	CUL1		NPRL3	PPP3R2	PGF
					ADH5	RBX1		SKP2	RASGRF1	VEGFC
					PLRG1	SKP2		RNF152	RASGRF2	VEGFD
					ROR1	CCNA2		RPTOR	RASGRP1	HGF
					RAB3B	CCNA1		AKT1S1	RASGRP2	ANGPT1
					DIAPH3	CDC6		MTOR	RASGRP3	ANGPT2
					GNL2	CDC45		DEPTOR	RASGRP4	ANGPT4
					FGF2	CDC7		MLST8	RAPGEF2	EFNA1
					NMNAT2	DBF4		TELO2	NF1	EFNA2
					KIF20A	CDK1		TTI1	RASA1	EFNA3
					CENPI	CCNB1		CLIP1	RASA2	EFNA4
					DDX1	CCNB2		GRB10	RAP1A	EFNA5
					XXYLT1	CCNB3		LPIN1	RAP1B	EGFR
					GPR176	CDC25B		LPIN3	EGF	ERBB2
					BBS9	CDC25C		LPIN2	TGFA	ERBB3
					C14orf166	YWHAZ		ULK1	EREG	ERBB4
					BOD1	YWHAB		ULK2	AREG	FGFR1
					CDC123	YWHAQ		EIF4EBP1	FGF1	FGFR2
					SNRPD3	YWHAE		EIF4E	FGF2	FGFR3
					FAM118B	YWHAH		EIF4E2	FGF3	FGFR4
					DPH3	YWHAG		EIF4E1B	FGF4	NGFR
					EIF2B3	PLK1		RPS6KB1	FGF17	NTRK1
					RPF2	WEE1		RPS6KB2	FGF6	NTRK2
					APLP1	WEE2		EIF4B	FGF7	INSR
					DACT1	PKMYT1		RPS6	FGF8	IGF1R
					PDHB	CCNH		STRADA	FGF9	PDGFRA
					C14orf119	CDK7		STRADB	FGF10	PDGFRB
					DTD1	ANAPC1		STK11	FGF16	CSF1R
					SAMM50	ANAPC2		CAB39	FGF5	KIT
					CCL26	CDC27		CAB39L	FGF18	FLT3
					MED20	ANAPC4		PRKAA1	FGF20	FLT1
					UTP6	ANAPC5		PRKAA2	FGF22	FLT4
					RARS2	CDC16		TSC1	FGF19	KDR
					ARMCX2	ANAPC7		TSC2	FGF21	MET
					RARS	CDC23		TBC1D7	FGF23	TEK
					MTHFD2	ANAPC10		TBC1D7-LOC100130357 readthrough [KO:K20396]	NGF	EPHA2
					DHX15	ANAPC11		RHEB	BDNF	GRB2
					HTR7	CDC26		DDIT4	NTF3	SOS1
					MTHFD1L	ANAPC13		WNT1	NTF4	SOS2
					ARMC9	ANAPC15		WNT2	INS	HRAS
					XPOT	ANAPC16		WNT2B	IGF1	KRAS
					IARS	CDC20		WNT3	IGF2	NRAS
					HDX	PTTG1		WNT3A	PDGFA	RAF1
					ACTRT3	PTTG2		WNT4	PDGFB	MAP2K1
					ERCC2	ESPL1		WNT5A	PDGFC	MAP2K2
					TBC1D16	SMC1A		WNT5B	PDGFD	MAPK1
					GARS	SMC1B		WNT6	CSF1	MAPK3
					KIF7	SMC3		WNT7A	KITLG	IRS1
					UBE2K	STAG2		WNT7B	FLT3LG	TLR2
					SLC25A3	STAG1		WNT8A	VEGFA	TLR4
					ICMT	RAD21		WNT8B	VEGFB	RAC1
					UGGT2	TTK		WNT9A	PGF	IGH
					ATP11C	BUB1		WNT9B	VEGFC	SYK
					SLC24A1	BUB3		WNT10B	VEGFD	CD19
					EIF2AK4	BUB1B		WNT10A	HGF	PIK3AP1
					GPX8	MAD1L1		WNT11	ANGPT1	GH1
					ALX1	MAD2L1		WNT16	ANGPT2	GH2
					OSTC	MAD2L2		FZD1	ANGPT4	CSH1
					TRPC4	FZR1		FZD7	EFNA1	CSH2
					HAS2	CDC14B		FZD2	EFNA2	PRL
					FZD2	CDC14A		FZD3	EFNA3	OSM
					TRNT1	ATR		FZD4	EFNA4	IL2
					MMADHC	ATM		FZD5	EFNA5	IL3
					SNX8	TP53		FZD8	EGFR	IL6
					CDH6	CHEK1		FZD6	ERBB2	IL4
					HAT1	CHEK2		FZD10	ERBB3	IL7
					SEC11A	CREBBP		FZD9	ERBB4	IFNA1
					DIMT1	EP300		LRP5	FGFR1	IFNA2
					TM2D2	PRKDC		LRP6	FGFR2	IFNA4
					FST	MDM2		DVL3	FGFR3	IFNA5
					GBE1	GADD45A		DVL2	FGFR4	IFNA6
						GADD45B		DVL1	NGFR	IFNA7
						GADD45G		GSK3B	NTRK1	IFNA8
						PCNA		TNF	NTRK2	IFNA10
						SFN		TNFRSF1A	INSR	IFNA13
						CDC25A		IKBKB	IGF1R	IFNA14
						ORC1		INS	PDGFRA	IFNA16
						ORC2		IGF1	PDGFRB	IFNA17
						ORC3		INSR	CSF1R	IFNA21
						ORC4		IGF1R	KIT	IFNB1
						ORC5		GRB2	FLT3	EPO
						ORC6		SOS1	FLT1	CSF3
						MCM2		SOS2	FLT4	GHR
						MCM3		HRAS	KDR	PRLR
						MCM4		KRAS	MET	OSMR
						MCM5		NRAS	TEK	IL2RA
						MCM6		BRAF	EPHA2	IL2RB
						MCM7		RAF1	GRB2	IL2RG
								MAP2K1	SOS1	IL3RA
								MAP2K2	SOS2	IL6R
								MAPK1	HRAS	IL4R
								MAPK3	KRAS	IL7R
								RPS6KA3	NRAS	IFNAR1
								RPS6KA1	RRAS	IFNAR2
								RPS6KA2	RRAS2	EPOR
								RPS6KA6	MRAS	CSF3R
								IRS1	ARAF	JAK1
								PIK3R1	BRAF	JAK2
								PIK3R2	RAF1	JAK3
								PIK3R3	MAP2K1	COL1A1
								PIK3CA	MAP2K2	COL1A2
								PIK3CD	LAMTOR3	COL2A1
								PIK3CB	MAPK1	COL4A2
								PTEN	MAPK3	COL4A4
								PDPK1	MKNK1	COL4A6
								AKT1	MKNK2	COL4A1
								AKT2	RPS6KA3	COL4A5
								AKT3	RPS6KA1	COL4A3
								CHUK	RPS6KA2	COL6A1
								MAPKAP1	RPS6KA6	COL6A2
								RICTOR	ATF4	COL6A3
								PRR5	ELK1	COL6A6
								RHOA	ELK4	COL6A5
								PRKCA	MYC	COL9A1
								PRKCB	SRF	COL9A2
								PRKCG	FOS	COL9A3
								SGK1	MAPT	LAMA1
									STMN1	LAMA2
									PLA2G4E	LAMA3
									PLA2G4A	LAMA5
									JMJD7-PLA2G4B	LAMA4
									PLA2G4B	LAMB1
									PLA2G4C	LAMB2
									PLA2G4D	LAMB3
									PLA2G4F	LAMB4
									TNF	LAMC1
									IL1A	LAMC2
									IL1B	LAMC3
									TGFB1	CHAD
									TGFB2	RELN
									TGFB3	THBS1
									TNFRSF1A	COMP
									IL1R1	THBS2
									IL1RAP	THBS3
									TGFBR1	THBS4
									TGFBR2	FN1
									FASLG	SPP1
									FAS	VTN
									CD14	TNC
									RAC1	TNN
									RAC2	TNR
									RAC3	TNXB
									CDC42	VWF
									TRADD	IBSP
									CASP3	ITGA1
									TRAF2	ITGA2
									DAXX	ITGA2B
									MYD88	ITGA3
									IRAK1	ITGA4
									IRAK4	ITGA5
									TRAF6	ITGA6
									GADD45A	ITGA7
									GADD45B	ITGA8
									GADD45G	ITGA9
									TAB1	ITGA10
									TAB2	ITGA11
									ECSIT	ITGAV
									MAP4K3	ITGB1
									MAP4K4	ITGB3
									MAP4K1	ITGB4
									PAK1	ITGB5
									PAK2	ITGB6
									STK4	ITGB7
									STK3	ITGB8
									MAP4K2	PTK2
									MAP3K8	PIK3CA
									MAP3K1	PIK3CD
									MAP3K11	PIK3CB
									MAP3K2	PIK3R1
									MAP3K3	PIK3R2
									MAP3K13	PIK3R3
									MAP3K12	F2R
									MAP3K20	CHRM1
									MAP3K6	CHRM2
									MAP3K5	LPAR1
									MAP3K7	LPAR2
									MAP3K4	LPAR3
									TAOK2	LPAR4
									TAOK3	LPAR5
									TAOK1	LPAR6
									MAP2K4	GNB1
									MAP2K7	GNB2
									MAP2K3	GNB3
									MAP2K6	GNB4
									MAPK8IP1	GNB5
									MAPK8IP2	GNG2
									MAPK8IP3	GNG3
									FLNA	GNG4
									FLNC	GNG5
									FLNB	GNG7
									CRK	GNG8
									CRKL	GNG10
									ARRB1	GNG11
									ARRB2	GNG12
									MAPK8	GNG13
									MAPK10	GNGT1
									MAPK9	GNGT2
									MAPK11	PIK3CG
									MAPK12	PIK3R5
									MAPK13	PIK3R6
									MAPK14	PDPK1
									MAPKAPK5	STK11
									MAPKAPK2	PRKAA1
									MAPKAPK3	PRKAA2
									RPS6KA5	DDIT4
									RPS6KA4	TSC1
									CDC25B	TSC2
									NFATC1	RHEB
									NFATC3	MLST8
									JUN	MTOR
									JUND	RPTOR
									ATF2	EIF4EBP1
									TP53	EIF4E
									DDIT3	EIF4E2
									MAX	EIF4E1B
									MEF2C	RPS6KB1
									HSPB1	RPS6KB2
									AKT1	EIF4B
									AKT2	RPS6
									AKT3	PRKCA
									PPM1A	PKN1
									PTPRR	PKN2
									PTPN5	PKN3
									PTPN7	SGK1
									DUSP1	SGK2
									DUSP4	SGK3
									DUSP2	C8orf44-SGK3
									DUSP7	AKT1
									DUSP8	AKT2
									DUSP5	AKT3
									DUSP16	MAGI1
									DUSP6	MAGI2
									DUSP9	PTEN
									DUSP10	THEM4
									DUSP3	PPP2CA
									PPP5C	PPP2CB
									PPM1B	PPP2R1B
									HSPA8	PPP2R1A
									HSPA1A	PPP2R2A
									HSPA2	PPP2R2B
									HSPA1L	PPP2R2C
									HSPA1B	PPP2R2D
									HSPA6	PPP2R3B
									MECOM	PPP2R3C
									MAP2K5	PPP2R3A
									MAPK7	PPP2R5B
									NR4A1	PPP2R5C
									MAP3K14	PPP2R5D
									CHUK	PPP2R5E
									IKBKB	PPP2R5A
									IKBKG	HSP90AA1
									NLK	HSP90AB1
									NFKB1	HSP90B1
									NFKB2	CDC37
									RELA	CRTC2
									RELB	PHLPP1
										PHLPP2
										TCL1A
										TCL1B
										MTCP1
										NOS3
										BRCA1
										GSK3B
										GYS2
										GYS1
										PCK1
										PCK2
										G6PC1
										G6PC2
										G6PC3
										MYC
										CCND1
										CDKN1A
										CDKN1B
										CDK2
										CDK4
										CDK6
										CCND2
										CCND3
										CCNE1
										CCNE2
										FOXO3
										RBL2
										FASLG
										BCL2L11
										YWHAZ
										YWHAB
										YWHAQ
										YWHAE
										YWHAH
										YWHAG
										BAD
										BCL2L1
										BCL2
										CASP9
										CREB1
										ATF2
										ATF4
										CREB3
										CREB3L1
										CREB3L2
										CREB3L3
										CREB3L4
										CREB5
										ATF6B
										MCL1
										RXRA
										NR4A1
										IKBKG
										CHUK
										IKBKB
										RELA
										NFKB1
										MYB
										MDM2
										TP53

## Sheet: Table S3
Table S3. Proteins with significant expression correlations with DEPTH2 scores in at least 5 cancer types
1. Proteins whose expression levels have positive expression correlations with DEPTH2 scores in at least 5 cancer types
“1” indicates that the protein has a significant positive expression correlation with DEPTH2 scores (Spearman correlation, FDR < 0.05);
“0” indicates that the protein has no significant positive expression correlation with DEPTH2 scores (Spearman correlation, FDR ≥ 0.05);
"Total" indicates the number of cancer types in which the protein has significant positive expression correlation with DEPTH2 scores.
Protein	ACC	BLCA	BRCA	CESC	CHOL	COAD	DLBC	ESCA	GBM	HNSC	KICH	KIRC	KIRP	LGG	LIHC	LUAD	LUSC	MESO	OV	PAAD	PCPG	PRAD	READ	SARC	SKCM	STAD	TGCT	THCA	THYM	UCEC	UCS	UVM	Total
Cyclin_B1	0	1	1	0	0	0	0	0	0	0	0	1	1	1	1	1	1	0	1	0	1	1	0	0	0	1	0	0	0	1	0	0	13
MSH6	0	0	1	1	0	0	0	0	0	0	1	0	1	0	1	1	1	0	1	0	0	0	0	1	0	0	0	0	0	1	0	0	10
MSH2	0	1	1	1	0	0	0	0	0	0	0	0	0	0	0	1	1	0	1	0	1	0	0	1	0	0	0	0	0	1	0	0	9
PAI-1	0	0	0	0	0	0	0	0	0	0	0	1	0	1	1	1	0	0	0	0	0	1	0	0	1	1	0	0	1	1	0	0	9
Bim	0	1	0	0	0	0	0	0	0	1	0	0	0	0	1	1	1	0	0	0	0	1	0	0	0	1	0	1	0	1	0	0	9
ASNS	0	1	1	0	0	0	0	0	0	0	0	1	1	1	1	1	0	0	0	0	0	1	0	0	0	0	0	0	1	0	0	0	9
Ku80	0	0	1	1	0	0	0	0	0	0	0	0	0	1	1	0	1	0	1	0	0	1	0	1	0	1	0	0	0	0	0	0	9
XRCC1	0	0	0	1	0	0	0	0	0	1	1	1	0	0	0	1	0	0	1	0	1	1	0	1	0	0	0	0	0	0	0	0	9
PCNA	0	0	1	0	0	0	0	0	0	0	0	1	1	0	1	1	0	0	1	0	0	1	0	0	0	0	0	0	0	1	0	0	8
FoxM1	0	1	1	0	0	0	0	0	0	0	0	1	0	0	0	1	1	0	0	0	1	0	0	0	0	1	0	0	0	1	0	0	8
MIG-6	0	0	1	0	0	0	0	0	0	0	0	0	0	1	0	0	1	0	0	1	0	1	0	0	1	1	0	0	0	1	0	0	8
TFRC	0	0	1	0	0	0	0	0	0	0	0	1	1	1	1	1	0	0	0	0	0	1	0	0	0	0	0	0	0	1	0	0	8
ER-alpha_pS118	0	0	0	1	0	0	0	0	0	0	0	1	0	0	0	0	1	0	1	0	0	1	0	1	0	1	0	1	0	0	0	0	8
Chk2	0	0	1	1	0	0	0	0	0	1	0	1	0	1	0	1	1	0	0	0	1	0	0	0	0	0	0	0	0	0	0	0	8
p27_pT157	0	1	1	0	0	1	0	0	0	0	0	0	0	0	1	0	1	0	1	0	0	0	0	0	0	0	0	0	0	1	0	0	7
eIF4G	0	0	1	0	0	0	0	0	0	0	0	0	1	1	0	0	0	0	0	0	0	1	0	0	0	1	0	0	1	1	0	0	7
Cyclin_E1	0	0	1	0	0	0	0	0	0	0	0	1	1	0	0	1	0	0	0	0	0	1	0	0	0	1	0	0	0	1	0	0	7
ACC1	0	0	0	0	0	0	0	0	0	0	0	1	0	0	1	0	1	0	0	0	0	1	0	0	0	1	0	1	1	0	0	0	7
53BP1	0	0	0	0	0	0	0	0	0	0	0	0	1	0	1	0	1	0	0	0	0	1	0	1	0	1	0	1	0	0	0	0	7
Bap1-c-4	0	0	1	0	0	0	0	0	0	0	0	0	0	0	0	1	1	0	1	0	0	1	0	1	0	1	0	0	0	0	0	0	7
p70S6K	0	0	1	0	0	0	0	0	0	0	1	0	0	1	1	0	1	0	0	0	0	1	0	0	0	1	0	0	0	0	0	0	7
RBM15	0	0	1	0	0	0	0	0	0	0	0	0	0	1	1	0	1	0	1	0	0	1	0	1	0	0	0	0	0	0	0	0	7
S6	0	0	1	0	0	0	0	0	0	0	0	1	0	1	1	1	0	0	0	0	0	1	0	1	0	0	0	0	0	0	0	0	7
eEF2	0	0	1	0	0	0	0	0	0	0	0	1	0	1	1	1	0	0	0	0	1	1	0	0	0	0	0	0	0	0	0	0	7
Cyclin_E2	0	1	1	0	0	0	0	0	0	0	0	1	1	0	0	1	1	0	0	0	0	1	0	0	0	0	0	0	0	0	0	0	7
p53	0	0	1	0	0	0	0	0	0	0	0	1	0	0	0	1	0	0	0	0	1	0	0	0	0	0	0	0	1	1	0	0	6
Chk2_pT68	0	0	1	0	0	0	0	0	0	0	0	1	0	0	1	1	0	0	1	0	0	0	0	0	0	0	0	0	0	1	0	0	6
Notch1	0	0	1	0	0	0	0	0	0	1	0	0	1	0	0	0	0	0	0	0	1	0	0	0	0	0	1	0	0	1	0	0	6
Rad51	0	0	1	0	0	0	0	0	0	0	0	1	0	0	0	1	0	0	1	0	0	0	0	0	0	0	0	0	1	1	0	0	6
ERCC1	0	1	1	1	0	0	0	0	0	0	0	1	0	0	0	0	0	0	0	0	0	0	0	1	0	0	0	0	0	1	0	0	6
p62-LCK-ligand	0	0	1	0	0	0	0	0	0	0	0	1	1	0	0	0	0	0	0	0	0	1	0	0	0	0	0	0	1	1	0	0	6
Bid	1	0	0	0	0	0	0	0	0	0	0	0	0	1	1	1	0	0	0	0	0	0	0	0	0	0	1	0	1	0	0	0	6
FASN	0	0	0	0	0	0	0	0	0	0	0	1	1	0	0	0	0	0	0	0	0	1	0	1	0	1	0	0	1	0	0	0	6
P-Cadherin	0	0	1	0	0	0	0	0	0	0	0	1	1	0	0	1	0	0	0	0	0	0	0	0	0	0	0	1	1	0	0	0	6
C-Raf	0	0	1	0	0	1	0	0	0	0	0	0	0	1	1	0	0	0	0	0	0	1	0	0	0	0	0	1	0	0	0	0	6
p27_pT198	0	0	1	0	0	0	0	0	0	0	0	1	0	1	0	1	0	0	0	0	0	1	0	0	0	0	0	1	0	0	0	0	6
4E-BP1_pT70	0	0	1	0	0	0	0	0	0	0	0	1	0	1	1	1	0	0	0	0	0	0	0	0	0	0	1	0	0	0	0	0	6
cIAP	0	0	1	0	0	0	0	0	0	0	0	1	0	1	0	0	1	0	0	0	0	1	0	0	0	1	0	0	0	0	0	0	6
TIGAR	0	0	0	1	0	0	0	0	0	0	0	1	0	1	1	1	0	0	0	0	0	1	0	0	0	0	0	0	0	0	0	0	6
Chk1	0	0	1	0	0	0	0	0	0	0	0	1	1	0	0	1	0	0	1	0	1	0	0	0	0	0	0	0	0	0	0	0	6
Fibronectin	0	0	0	0	0	0	0	0	0	0	0	0	1	1	1	0	0	0	0	0	1	0	0	0	0	0	0	0	0	1	0	0	5
G6PD	0	0	0	0	0	0	0	0	0	0	0	1	1	0	0	1	0	0	0	0	0	0	0	0	0	0	0	0	1	1	0	0	5
CDK1	0	0	1	0	0	0	0	0	0	0	0	0	0	1	0	0	0	0	1	0	1	0	0	0	0	0	0	0	0	1	0	0	5
Src	0	0	1	0	0	0	0	0	0	0	0	1	0	0	1	1	0	0	0	0	0	0	0	0	0	0	0	0	1	0	0	0	5
ACC_pS79	0	0	0	0	0	0	0	0	0	0	0	1	0	0	0	0	1	0	0	0	0	1	0	0	0	1	0	0	1	0	0	0	5
YB-1_pS102	0	0	0	0	0	0	0	0	0	0	0	1	0	1	1	0	0	0	0	0	0	0	0	0	0	0	1	1	0	0	0	0	5
SF2	0	0	0	0	0	0	0	0	0	0	0	1	0	0	0	1	1	0	0	0	1	1	0	0	0	0	0	0	0	0	0	0	5
Chk1_pS345	0	0	1	0	0	0	0	0	0	0	0	1	0	0	0	1	1	0	1	0	0	0	0	0	0	0	0	0	0	0	0	0	5
4E-BP1_pS65	0	0	1	0	0	0	0	0	0	0	0	0	1	0	1	1	0	0	1	0	0	0	0	0	0	0	0	0	0	0	0	0	5
IGFBP2	0	0	0	0	0	0	0	0	0	1	0	1	1	1	0	1	0	0	0	0	0	0	0	0	0	0	0	0	0	0	0	0	5
2. Proteins whose expression levels have negative expression correlations with DEPTH2 scores in at least 5 cancer types
“1” indicates that the protein has a significant negative expression correlation with DEPTH2 scores (Spearman correlation, FDR < 0.05);
“0” indicates that the protein has no significant negative expression correlation with DEPTH2 scores (Spearman correlation, FDR ≥ 0.05);
"Total" indicates the number of cancer types in which the protein has significant negative expression correlation with DEPTH2 scores.
Protein	ACC	BLCA	BRCA	CESC	CHOL	COAD	DLBC	ESCA	GBM	HNSC	KICH	KIRC	KIRP	LGG	LIHC	LUAD	LUSC	MESO	OV	PAAD	PCPG	PRAD	READ	SARC	SKCM	STAD	TGCT	THCA	THYM	UCEC	UCS	UVM	Total
MAPK_pT202_Y204	0	0	1	0	0	0	0	0	0	1	0	1	0	1	1	1	1	0	1	0	0	1	0	0	0	0	0	0	0	1	0	0	10
Src_pY416	0	0	0	1	0	0	0	0	0	1	0	1	0	1	1	0	1	0	0	0	0	0	0	0	1	0	1	0	0	1	0	0	9
MYH11	0	1	1	0	0	0	0	0	0	0	0	1	0	1	0	1	1	0	1	0	0	1	0	0	0	0	0	0	0	1	0	0	9
ER-alpha	0	0	1	0	0	0	0	0	0	0	0	1	0	1	1	1	1	0	0	0	0	0	0	0	0	1	0	0	0	1	0	0	8
Akt_pS473	0	0	1	0	0	0	0	0	0	0	0	1	1	0	1	1	1	0	0	0	0	1	0	0	0	0	0	0	0	1	0	0	8
Annexin-1	0	0	1	1	0	0	0	0	0	0	0	0	1	0	1	1	0	0	1	0	0	1	0	0	0	0	0	0	0	1	0	0	8
Src_pY527	0	0	1	0	0	0	0	0	0	1	0	1	1	1	1	0	0	0	0	0	0	1	0	0	0	0	0	0	0	1	0	0	8
PI3K-p85	0	0	1	0	0	0	0	0	0	0	0	0	1	0	0	1	0	0	1	0	0	0	0	0	0	1	1	1	0	1	0	0	8
p38_pT180_Y182	0	1	1	1	0	0	0	0	0	0	0	1	1	0	0	1	0	0	0	0	0	1	0	0	0	0	0	0	0	1	0	0	8
Lck	0	0	1	1	0	0	0	0	0	0	0	0	0	0	0	1	0	0	1	0	0	0	0	0	0	1	1	1	1	0	0	0	8
PTEN	0	0	1	0	0	0	0	0	0	1	0	1	0	1	0	1	0	0	1	0	1	0	0	0	0	0	0	0	1	0	0	0	8
INPP4B	0	1	1	0	0	0	0	0	0	0	0	0	0	1	1	0	0	0	1	0	0	0	0	0	0	0	0	1	0	1	0	0	7
STAT3_pY705	0	1	1	0	0	0	0	0	0	0	0	1	1	0	1	1	0	0	0	0	0	0	0	0	0	0	0	0	0	1	0	0	7
PREX1	0	0	1	0	0	0	0	0	0	0	0	1	0	1	1	0	0	0	1	0	0	0	0	0	0	1	1	0	0	0	0	0	7
mTOR_pS2448	0	0	0	0	0	0	0	0	0	1	0	0	1	0	1	1	0	0	0	0	1	1	0	0	0	0	1	0	0	0	0	0	7
c-Kit	0	0	1	0	0	0	0	0	0	0	0	1	0	1	0	1	0	0	0	0	0	1	0	1	0	1	0	0	0	0	0	0	7
Collagen_VI	0	0	1	0	0	0	0	0	0	0	0	1	1	0	0	0	1	0	0	0	1	0	0	1	0	1	0	0	0	0	0	0	7
Caveolin-1	0	0	1	0	0	0	0	0	0	1	0	1	0	0	0	1	1	0	1	0	0	1	0	0	0	0	0	0	0	0	0	0	7
Akt_pT308	0	0	0	0	0	0	0	0	1	0	0	0	0	0	1	1	1	0	0	0	0	1	0	0	0	0	0	0	0	1	0	0	6
Tuberin_pT1462	0	0	1	0	0	0	0	0	0	0	0	1	1	0	1	1	0	0	0	0	0	0	0	0	0	0	0	0	0	1	0	0	6
AR	0	0	1	0	0	0	0	0	0	0	0	1	1	0	1	0	0	0	0	0	0	0	0	0	0	0	0	0	1	1	0	0	6
PR	0	0	1	0	0	0	0	0	0	0	0	0	0	1	1	0	0	0	0	0	0	1	0	1	0	0	0	0	0	1	0	0	6
PKC-delta_pS664	0	0	0	0	0	0	0	0	0	0	1	0	0	1	1	1	0	0	0	0	0	1	0	0	0	0	0	0	1	0	0	0	6
p27	0	0	1	0	0	0	0	0	0	0	0	1	0	0	1	1	0	0	0	0	0	0	0	0	0	1	0	0	1	0	0	0	6
HER3	0	0	1	0	0	0	0	0	0	0	0	1	1	0	0	0	0	0	1	0	0	0	0	0	1	0	0	1	0	0	0	0	6
14-3-3_epsilon	0	0	0	0	0	0	0	0	0	0	1	0	1	1	1	0	0	0	0	0	0	0	0	0	0	0	1	1	0	0	0	0	6
STAT5-alpha	0	0	1	0	0	0	0	0	0	0	0	1	0	0	0	1	0	0	0	0	1	0	0	0	1	0	1	0	0	0	0	0	6
Bcl-2	0	0	1	0	0	0	0	0	0	0	0	1	1	1	1	0	0	0	0	0	0	0	0	0	0	1	0	0	0	0	0	0	6
PKC-alpha	0	1	1	0	0	0	0	0	0	1	0	0	0	1	0	1	0	0	0	0	0	1	0	0	0	0	0	0	0	0	0	0	6
Rictor	0	1	1	0	0	0	0	0	0	0	0	0	0	1	0	1	0	0	0	0	1	1	0	0	0	0	0	0	0	0	0	0	6
PDCD4	0	0	1	1	0	0	0	0	0	0	0	0	0	0	0	1	0	0	0	0	0	0	0	0	0	0	1	0	0	1	0	0	5
AMPK_alpha	0	0	1	0	0	0	0	0	0	0	1	1	1	0	0	0	0	0	0	0	0	0	0	0	0	0	0	0	0	1	0	0	5
MEK1_pS217_S221	0	0	1	0	0	0	0	0	0	0	0	0	0	0	0	0	1	0	0	0	0	1	0	1	0	0	0	0	0	1	0	0	5
NF2	0	0	0	0	0	0	0	0	0	0	0	1	1	0	0	0	0	0	0	0	0	1	0	0	0	0	1	0	0	1	0	0	5
YAP_pS127	0	0	1	0	0	0	0	0	0	1	0	0	0	0	0	1	0	0	0	0	0	1	0	0	0	0	0	0	0	1	0	0	5
p38_MAPK	0	0	1	0	0	0	0	0	0	1	0	1	0	0	0	1	0	0	0	0	0	0	0	0	0	0	0	1	0	0	0	0	5
Paxillin	0	0	1	0	0	0	0	0	0	0	0	1	0	0	0	1	0	0	0	0	1	0	0	0	0	0	0	1	0	0	0	0	5
ERK2	0	0	1	0	0	0	0	0	0	0	0	1	0	1	0	0	0	0	0	0	0	0	0	1	0	0	0	1	0	0	0	0	5
Caspase-7_cleavedD198	0	0	0	1	0	0	0	0	0	0	0	0	0	1	0	0	0	0	0	0	0	0	0	0	1	1	1	0	0	0	0	0	5
CD31	0	0	0	0	0	0	0	0	0	0	0	1	0	1	1	0	1	0	0	0	0	0	0	0	0	1	0	0	0	0	0	0	5
PEA15	0	0	1	0	0	0	0	0	0	0	0	0	0	1	0	1	0	0	1	0	0	0	0	1	0	0	0	0	0	0	0	0	5
PKC-alpha_pS657	0	1	1	0	0	0	0	0	0	0	0	0	0	1	0	1	0	0	0	0	0	1	0	0	0	0	0	0	0	0	0	0	5
PKC-pan_BetaII_pS660	0	1	0	0	0	0	0	0	0	0	1	0	0	1	0	1	0	0	0	0	0	1	0	0	0	0	0	0	0	0	0	0	5
FOXO3a_pS318_S321	0	0	0	0	0	0	0	0	0	0	0	0	1	0	1	0	1	0	1	0	0	1	0	0	0	0	0	0	0	0	0	0	5
Rictor_pT1135	0	0	1	0	0	0	0	0	0	0	0	1	1	0	0	1	0	0	0	0	0	1	0	0	0	0	0	0	0	0	0	0	5
HER2_pY1248	0	0	0	0	0	0	0	0	0	1	0	1	0	0	1	1	0	0	0	0	0	1	0	0	0	0	0	0	0	0	0	0	5
Annexin_VII	0	0	1	0	0	0	0	0	0	0	0	1	1	1	0	0	0	0	0	0	1	0	0	0	0	0	0	0	0	0	0	0	5
NDRG1_pT346	0	0	0	1	0	0	0	0	0	0	0	1	1	1	0	0	1	0	0	0	0	0	0	0	0	0	0	0	0	0	0	0	5

## Sheet: Table S4
Table S4. Spearman correlations between DEPTH2 score and drug sensitivity (IC50 values) of cancer cell lines to 265 compounds
Note: The compounds to which DEPTH2 scores have significant positive and negative correlations with drug sensitivity (IC50 values) are highlighted in red and in blue, respectively (Spearman correlation, P < 0.05); ρ: correlation coefficient.
Drug	ρ	P
Vorinostat	-0.386678	3.90581e-31
TL-2-105	-0.386609	1.33356e-33
AC220	-0.364459	1.09149e-29
KIN001-102	-0.35276	7.99317e-28
I-BET	-0.346066	1.15843e-26
Tubastatin A	-0.340011	1.03399e-25
ABT-263	-0.328982	1.58691e-22
MP470	-0.326696	9.93741e-24
KIN001-260	-0.314146	4.84784e-22
WZ3105	-0.313322	5.37509e-22
NPK76-II-72-1	-0.308029	3.11038e-21
UNC0638	-0.307115	5.03696e-21
AR-42	-0.303955	1.68422e-20
BMS-345541	-0.30162	1.90026e-20
YM201636	-0.300829	2.78573e-20
XMD13-2	-0.296554	9.49686e-20
XMD14-99	-0.292281	3.17604e-19
TAK-715	-0.29081	4.44981e-19
THZ-2-102-1	-0.288586	2.13162e-18
KIN001-135	-0.287477	6.77562e-09
SB52334	-0.287238	1.54723e-18
Masitinib	-0.283497	4.08314e-18
PHA-793887	-0.281981	5.98351e-18
Methotrexate	-0.281136	1.40565e-16
KIN001-236	-0.280737	9.19464e-18
T0901317	-0.27912	1.76522e-17
OSI-027	-0.278824	1.83706e-17
GSK1070916	-0.278049	5.34687e-17
VX-702	-0.277664	3.69617e-16
CAY10603	-0.275699	4.47421e-17
PXD101, Belinostat	-0.271272	3.17562e-16
PIK-93	-0.269928	1.72168e-16
GSK690693	-0.269928	1.72212e-16
KIN001-244	-0.267511	3.38237e-16
TPCA-1	-0.265422	5.62107e-16
TL-1-85	-0.26382	8.51398e-16
JW-7-24-1	-0.263493	8.6113e-16
UNC1215	-0.262161	1.5081e-15
QL-X-138	-0.258637	4.71218e-15
VNLG/124	-0.255956	6.95893e-15
BX-912	-0.25393	1.00406e-14
CUDC-101	-0.253672	1.9667e-14
OSI-930	-0.253249	1.18849e-14
TG101348	-0.252189	1.49244e-14
NG-25	-0.252153	1.60993e-14
Zibotentan, ZD4054	-0.246126	6.93979e-14
AV-951	-0.245884	7.35308e-14
QL-XI-92	-0.244897	8.73654e-14
MPS-1-IN-1	-0.243571	1.35587e-13
Ruxolitinib	-0.239964	2.7958e-13
KIN001-270	-0.236683	6.33561e-13
Phenformin	-0.234064	1.44787e-12
AT-7519	-0.234036	1.19155e-12
BIX02189	-0.233727	1.24193e-12
CP466722	-0.22993	2.67665e-12
NVP-BHG712	-0.229732	3.03952e-12
PI-103	-0.227519	5.99001e-12
Imatinib	-0.227091	5.00608e-06
FK866	-0.223299	1.78837e-11
SB-505124	-0.222581	1.03346e-11
STF-62247	-0.221667	1.85375e-11
5-Fluorouracil	-0.21706	5.40467e-11
CX-5461	-0.213482	1.02596e-10
XMD15-27	-0.213119	1.00484e-10
EHT 1864	-0.212841	9.22852e-11
JQ1	-0.212463	1.20509e-10
Genentech Cpd 10	-0.208579	2.47024e-10
ATRA	-0.208311	1.60691e-09
BMS-708163	-0.208032	2.81979e-10
GW-2580	-0.20677	3.62809e-10
SNX-2112	-0.202984	9.49341e-10
EX-527	-0.200306	1.42861e-09
GSK429286A	-0.197532	2.14167e-09
UNC0638	-0.196899	1.85482e-09
LAQ824	-0.195995	7.52683e-09
SGC0946	-0.195897	3.42678e-09
Crizotinib	-0.194504	9.99755e-05
PAC-1	-0.192931	1.67003e-08
KIN001-266	-0.19195	6.45423e-09
Vismodegib	-0.187217	5.22422e-08
SB-715992	-0.186112	1.79073e-08
NSC-207895	-0.184506	2.69957e-08
Nilotinib	-0.183995	1.94456e-07
ZSTK474	-0.183311	2.942e-08
AZD8055	-0.182604	1.23775e-07
PHA-665752	-0.179603	0.000328134
Lenalidomide	-0.178537	2.10304e-07
Tamoxifen	-0.177554	6.64257e-08
GSK2126458	-0.175944	1.04679e-07
Temozolomide	-0.1745	1.49226e-07
AICAR	-0.174266	4.8974e-07
Bicalutamide	-0.173205	3.58526e-07
CH5424802	-0.171915	2.14795e-07
CP724714	-0.170462	2.60255e-07
THZ-2-49	-0.16976	3.14796e-07
Y-39983	-0.16862	3.61799e-07
QL-XII-47	-0.166695	4.92722e-07
FR-180204	-0.165663	5.80611e-07
Nutlin-3a	-0.15865	4.08992e-06
CAL-101	-0.157719	1.91008e-06
PD-173074	-0.156197	5.77061e-06
ABT-869	-0.152328	4.31908e-06
Cyclopamine	-0.150744	0.00298751
FMK	-0.148265	3.33714e-05
SB590885	-0.146589	2.6556e-05
NSC-87877	-0.146012	1.73719e-05
Axitinib	-0.141168	4.47765e-05
QL-XII-61	-0.13481	0.00362181
MS-275	-0.133235	0.00834246
Olaparib	-0.131382	0.000143119
SL 0101-1	-0.129563	0.000197316
PF-4708671	-0.129363	0.000106852
Salubrinal	-0.126487	0.0126492
Bicalutamide	-0.122577	0.000304517
AS605240	-0.118435	0.000375575
BAY 61-3606	-0.114606	0.000809823
XMD11-85h	-0.112525	0.0130593
GNF-2	-0.108434	0.0331914
ABT-888	-0.106962	0.0019926
IPA-3	-0.101919	0.00288197
XL-184	-0.0997054	0.00274923
LY317615	-0.0992276	0.00286645
KU-55933	-0.0890538	0.0100807
MK-2206	-0.0878989	0.0122737
EKB-569	-0.0851005	0.0106028
CCT007093	-0.0809867	0.0147554
VX-11e	-0.0798869	0.016525
CEP-701	-0.0790195	0.0226427
BMS-536924	-0.0764544	0.0210094
PFI-1	-0.0690149	0.0367611
GSK-1904529A	-0.0677079	0.0479266
BMS-754807	0.070251	0.0405927
Bosutinib	0.07035	0.0422436
Bexarotene	0.0703689	0.0412101
Cisplatin	0.0704461	0.042086
FTI-277	0.0707035	0.0378351
Vinorelbine	0.0735458	0.0306495
Temsirolimus	0.0744792	0.0328613
TW 37	0.0771791	0.0202996
SN-38	0.0793273	0.0163331
Tipifarnib	0.0794049	0.0204488
Olaparib (rescreen)	0.0803958	0.0163816
CCT018159	0.08313	0.0135261
NVP-BEZ235	0.0840047	0.0156121
AZD6482	0.0855342	0.0121471
AZD6482	0.0867387	0.00983421
Doxorubicin	0.0919646	0.00716082
BI-2536	0.0998576	0.0496479
piperlongumine	0.10049	0.00236622
RO-3306	0.101449	0.00333868
AS601245	0.101449	0.00304884
FH535	0.102978	0.00263285
Afatinib	0.104371	0.00257642
AZ628	0.10476	0.0379039
YK 4-279	0.105044	0.00327246
GDC0941 (rescreen)	0.106158	0.00167346
Gemcitabine	0.108998	0.00146892
(5Z)-7-Oxozeaenol	0.109439	0.00100078
PF-562271	0.117942	0.000582904
Embelin	0.118717	0.000504125
JNJ-26854165	0.119224	0.000332548
MG-132	0.120982	0.0168335
PD-0332991	0.12406	0.000398251
HG-6-64-1	0.127077	0.000188322
AZD6244	0.128498	0.000247919
Erlotinib	0.129425	0.0137268
CGP-60474	0.133479	0.00847514
Afatinib (rescreen)	0.140892	2.21489e-05
MLN4924	0.142757	0.000164643
XAV 939	0.14379	1.42569e-05
CHIR-99021	0.147152	9.31156e-06
BMN-673	0.149438	6.72452e-06
Lapatinib	0.149933	0.00310939
AUY922	0.155965	5.24086e-06
Paclitaxel	0.156364	0.00198076
TGX221	0.167102	0.000923883
Cytarabine	0.167419	1.25105e-06
Thapsigargin	0.167633	1.02983e-06
BMS-536924	0.173042	0.000608414
Bleomycin	0.176219	2.49119e-07
JW-7-52-1	0.183513	0.000360505
AZD-0530	0.183677	0.000237962
CI-1040	0.194005	2.0171e-08
Elesclomol	0.19443	1.56923e-08
Cetuximab	0.211386	3.73854e-10
Midostaurin	0.213517	2.2936e-10
Epothilone B	0.222253	5.10723e-11
A-770041	0.24759	7.62573e-07
WH-4-023	0.248525	7.62616e-07
Bortezomib	0.268761	6.77652e-08
PD-0325901	0.285688	5.36074e-17
AZD6244	0.297478	5.45318e-20
RDEA119	0.31573	1.41374e-20
RDEA119 (rescreen)	0.327588	4.13055e-23
Trametinib	0.358997	3.20519e-28
Bleomycin (50 uM)	0.366402	1.21601e-30
17-AAG	0.374394	3.27077e-29
Docetaxel	0.376586	1.84285e-29
Dasatinib	0.398031	4.56285e-16
Roscovitine	-0.099456	0.050577
Pyrimethamine	-0.0861886	0.0887591
ZG-10	-0.0810927	0.0740895
Sunitinib	-0.0767011	0.131507
Parthenolide	-0.0741428	0.142844
Rapamycin	-0.0666995	0.210606
QS11	-0.0632346	0.064738
XL-880	-0.0626305	0.0607917
PLX4720	-0.0612291	0.0771872
JQ12	-0.0567155	0.0970689
KIN001-055	-0.049176	0.140449
Sorafenib	-0.0478113	0.344484
AZD7762	-0.0454573	0.190231
OSI-906	-0.0446795	0.193138
S-Trityl-L-cysteine	-0.0440965	0.386987
IOX2	-0.0387901	0.241375
HG-5-88-01	-0.0384931	0.397638
BIRB 0796	-0.0367827	0.291307
NU-7441	-0.031994	0.356686
GDC0941	-0.0318306	0.360601
GSK269962A	-0.031128	0.347474
PLX4720 (rescreen)	-0.0284351	0.393403
AP-24534	-0.0273682	0.421988
CMK	-0.024298	0.633261
Dabrafenib	-0.0223467	0.513059
ZM-447439	-0.0215564	0.54595
AMG-706	-0.0169487	0.624801
Shikonin	-0.0122636	0.719498
XMD8-85	-0.0120811	0.812732
LFM-A13	-0.0120471	0.725329
JQ1	-0.0118606	0.727889
XMD8-92	-0.0115831	0.798747
GW 441756	-0.0082322	0.812801
BMS-708163	-0.00496442	0.881117
rTRAIL	-0.00396092	0.905281
BX-795	-0.000701313	0.983856
JNK Inhibitor VIII	0.000506046	0.988365
SB 216763	0.00248844	0.946377
Z-LLNle-CHO	0.00351189	0.945027
CGP-082996	0.00391865	0.938672
HG-5-113-01	0.00534322	0.906471
DMOG	0.00645652	0.850039
Pazopanib	0.00716096	0.834765
CHIR-99021	0.0148648	0.663152
Bryostatin 1	0.018784	0.584458
Gefitinib	0.0213023	0.540215
AG-014699	0.0284453	0.392709
VX-680	0.0297448	0.561684
Camptothecin	0.030342	0.382073
JNK-9L	0.034792	0.307299
OSU-03012	0.0372803	0.276774
YM155	0.0384133	0.257986
Etoposide	0.0397671	0.242936
681640	0.0407924	0.265813
Obatoclax Mesylate	0.0424099	0.217577
GSK-650394	0.0521963	0.1295
QL-VIII-58	0.0532415	0.240411
GW843682X	0.0536755	0.290968
Vinblastine	0.0541265	0.118528
AKT inhibitor VIII	0.0562423	0.0993003
Mitomycin C	0.0565539	0.0984201
GSK269962A	0.0606774	0.230676
BMS-509744	0.0851787	0.0934194
NVP-TAE684	0.0887851	0.0779919
WZ-1-84	0.0914785	0.0718798
A-443654	0.0919596	0.0703912

## Sheet: Table S5
Table S5. Correlations between ITH scores inferred by six different algorithms within individual cancer types
Note: The red color indicates a positive correlation and the blue color a negative correlation (Spearman correlation, P < 0.05); ρ: correlation coefficient.
DEPTH2 vs. DEPTH				DEPTH2 vs. tITH				DEPTH2 vs. MATH				DEPTH2 vs. PhyloWGS				DEPTH2 vs. ABSOLUTE
Cancer type	ρ	P		Cancer type	ρ	P		Cancer type	ρ	P		Cancer type	ρ	P		Cancer type	ρ	P
BLCA	0.543338	0		BRCA	0.557456	0		BRCA	0.254682	6.4799e-16		PRAD	0.351748	3.14243e-06		LIHC	0.161923	0.004076
BRCA	0.659953	0		LUAD	0.58951	0		LUAD	0.243385	3.03574e-08		BRCA	0.153927	4.72574e-06		LUSC	0.133133	0.00558062
COAD	0.557112	0		LUSC	0.419307	0		PAAD	0.348143	3.21007e-05		THYM	0.358977	0.000196351		BRCA	0.0894489	0.00595675
DLBC	0.760313	0		PAAD	0.621053	0		LGG	-0.178266	6.54706e-05		KIRC	0.174284	0.00123223		PRAD	0.134744	0.0112704
HNSC	0.50345	0		PRAD	0.524239	0		STAD	0.190613	0.000113569		PAAD	0.300124	0.00473846		LUAD	0.116121	0.0161167
KIRC	0.405849	0		THCA	0.42291	0		LIHC	0.190095	0.000303694		HNSC	0.132961	0.0049144		UCEC	0.136307	0.0187665
LGG	0.874927	0		LIHC	0.392699	2.37783e-15		UCEC	0.150022	0.00450101		OV	-0.20017	0.00846945		PAAD	0.170129	0.0437045
LIHC	0.771127	0		BLCA	0.311747	1.51392e-10		LUSC	0.124548	0.00607577		COAD	-0.172652	0.0256689		ACC	0.232578	0.0476932
LUAD	0.658912	0		COAD	0.353121	9.77418e-10		KIRP	0.148797	0.0127437		MESO	0.239692	0.0322378		UCS	-0.266857	0.0488979
MESO	0.842805	0		KIRC	0.256069	2.20433e-09		UCS	-0.320456	0.0154419		THCA	0.187846	0.0337264		READ	-0.209	0.0506781
PAAD	0.531178	0		UCEC	0.293917	9.77184e-09		THYM	0.242442	0.0265168		SKCM	0.139355	0.0431659		COAD	-0.121513	0.0629243
PCPG	0.806372	0		STAD	0.254248	1.67766e-07		KIRC	0.121118	0.0268725		ACC	0.221749	0.0630929		STAD	0.099836	0.0782759
PRAD	0.732148	0		ESCA	0.318961	1.07504e-05		LAML	0.218157	0.0377642		STAD	0.114855	0.0815182		THCA	0.101135	0.167284
SARC	0.769628	0		OV	0.247856	1.18735e-05		COAD	-0.120828	0.0437411		TGCT	0.138592	0.0987898		BLCA	0.106603	0.205078
STAD	0.586275	0		CHOL	0.671815	1.24497e-05		BLCA	0.0995073	0.0450904		GBM	-0.131163	0.166122		CHOL	-0.192864	0.282225
THYM	0.891986	0		HNSC	0.190287	1.24767e-05		OV	-0.136062	0.0479245		LUAD	0.0806152	0.240273		HNSC	-0.0428731	0.341152
UCEC	0.53002	0		CESC	0.247393	1.27508e-05		GBM	0.150118	0.0676929		ESCA	0.0934868	0.258413		KIRC	0.0436365	0.376991
UVM	0.770347	0		KIRP	0.195744	0.000803607		READ	-0.170569	0.105929		KICH	0.142206	0.274282		ESCA	0.0600832	0.459174
LUSC	0.361087	5.6147e-17		READ	0.254423	0.0130383		SKCM	0.0738226	0.112661		LUSC	0.0647138	0.289357		KICH	0.0908965	0.482298
OV	0.390721	1.6747e-12		GBM	0.169555	0.0290788		TGCT	0.138662	0.112759		LIHC	-0.12152	0.312726		KIRP	0.0372221	0.550946
KIRP	0.383568	1.73386e-11		KICH	0.187642	0.131183		CESC	0.0496905	0.403322		PCPG	0.0786574	0.324362		OV	-0.0249503	0.672208
ESCA	0.441356	4.73872e-10		ACC	0.130696	0.250377		KICH	-0.102316	0.416416		DLBC	-0.141773	0.401148		PCPG	0.0318408	0.709817
CESC	0.318968	1.39207e-08		SKCM	0.0520373	0.259087		THCA	0.030531	0.556128		UVM	0.0990044	0.455648		SKCM	0.0186466	0.712845
READ	0.546319	1.77199e-08		LAML	-0.0205117	0.788605		DLBC	-0.0827406	0.62521		UCS	-0.102835	0.506524		LAML	0.0428325	0.722837
ACC	0.585833	2.70738e-08		TGCT	-0.0161433	0.841299		HNSC	-0.0179175	0.690283		SARC	-0.0330397	0.622818		CESC	-0.0615878	0.729334
UCS	0.672025	3.1789e-08						ESCA	0.0285269	0.702787		KIRP	0.0437009	0.66116		SARC	-0.0225176	0.766743
THCA	0.171434	0.000103824						PRAD	-0.0140679	0.761979		LAML	0.0817385	0.747126		TGCT	0.0192317	0.815303
GBM	0.193056	0.0128085						PCPG	0.0238832	0.784149		UCEC	-0.0189353	0.851669		DLBC	0.0328744	0.830251
CHOL	0.342085	0.0417326						CHOL	0.040056	0.818945		CESC	0.0288812	0.873239		LGG	0.0103543	0.83028
TGCT	0.146911	0.0672801						ACC	0.0262201	0.82178		BLCA	0.0114156	0.894671		GBM	-0.00223795	0.97788
LAML	0.111797	0.142976						UVM	-0.0221424	0.847142		CHOL	-0.0127951	0.94096		UVM	0.00283118	0.982723
KICH	-0.0567164	0.650295						MESO	0.00696203	0.951414		LGG	-0.000840808	0.985007
SKCM	-0.000622632	0.989233						SARC	0.00301871	0.963445
tITH vs. DEPTH				tITH vs. MATH				tITH vs. PhyloWGS				tITH vs. ABSOLUTE
Cancer type	ρ	P		Cancer type	ρ	P		Cancer type	ρ	P		Cancer type	ρ	P
BLCA	0.781765	0		LUAD	0.305041	2.45912e-12		BRCA	0.166242	7.50796e-07		BRCA	0.160352	7.33455e-07
BRCA	0.893658	0		BRCA	0.193844	1.0208e-09		PRAD	0.323897	1.95555e-05		LUSC	0.159373	0.000886819
CESC	0.902575	0		LUSC	0.216613	1.50641e-06		PAAD	0.393268	0.000164479		LUAD	0.145784	0.00247081
COAD	0.70094	0		PAAD	0.392756	2.30289e-06		LUSC	0.148723	0.014443		PAAD	0.216291	0.00999459
ESCA	0.703501	0		COAD	-0.253759	1.78668e-05		THCA	0.213371	0.0155951		THCA	0.176545	0.0153684
GBM	0.857867	0		UCEC	-0.167632	0.00147925		KIRC	0.117317	0.0303171		ACC	0.273771	0.0190938
HNSC	0.663825	0		HNSC	-0.127242	0.00449598		OV	-0.144271	0.0590009		COAD	-0.140189	0.0316967
KICH	0.707588	0		PRAD	0.119936	0.00955648		KICH	0.22311	0.0839248		TGCT	-0.158583	0.0525907
KIRC	0.768679	0		ACC	-0.223869	0.0520738		LUAD	0.11282	0.0997637		PRAD	0.101522	0.0567042
KIRP	0.741066	0		SKCM	-0.0781024	0.0932327		CHOL	0.270524	0.110539		STAD	0.0930186	0.101005
LAML	0.579386	0		CESC	-0.0978977	0.0990647		CESC	-0.281592	0.112385		GBM	0.0990217	0.21875
LIHC	0.536092	0		GBM	-0.122724	0.135831		TGCT	-0.125381	0.135679		ESCA	0.0952861	0.23979
LUAD	0.766591	0		LIHC	-0.0785602	0.138491		UCEC	0.148598	0.140079		CESC	-0.200351	0.255911
LUSC	0.813498	0		CHOL	0.255182	0.138772		LIHC	-0.143221	0.233443		OV	-0.0666137	0.258161
OV	0.751663	0		KIRP	-0.0759587	0.204958		LAML	-0.294879	0.234875		CHOL	-0.192362	0.283502
PAAD	0.720704	0		READ	-0.127409	0.228332		HNSC	0.0459958	0.332466		KICH	0.122229	0.343945
PRAD	0.781016	0		KIRC	-0.0632344	0.249127		SKCM	0.0526486	0.446807		LIHC	0.0529544	0.350424
READ	0.701652	0		LAML	-0.119199	0.260424		STAD	0.0355976	0.590389		BLCA	0.0743057	0.377783
SKCM	0.821222	0		OV	-0.0665006	0.334963		BLCA	-0.0445985	0.604817		KIRC	-0.0324476	0.511318
STAD	0.64706	0		KICH	0.101617	0.419622		ACC	0.0483237	0.689017		UCEC	0.0317928	0.585249
TGCT	0.702157	0		THCA	-0.0371165	0.474212		GBM	-0.0340751	0.720119		READ	-0.0431966	0.689442
THCA	0.548121	0		TGCT	-0.0470068	0.592049		ESCA	0.0292842	0.723854		LAML	0.0410514	0.733925
UCEC	0.683604	0		STAD	-0.0231274	0.642609		KIRP	0.023637	0.812661		HNSC	0.00970394	0.829488
ACC	0.587658	2.3865e-08		BLCA	-0.00410819	0.934231		COAD	-0.0134341	0.863193		KIRP	0.0131331	0.833399
CHOL	0.761133	5.52666e-07		ESCA	-0.0061502	0.934456						SKCM	0.00754191	0.881674
DEPTH vs. MATH				DEPTH vs. PhyloWGS				DEPTH vs. ABSOLUTE
Cancer type	ρ	P		Cancer type	ρ	P		Cancer type	ρ	P
BRCA	0.255169	5.68414e-16		PRAD	0.475491	8.3904e-11		BRCA	0.188438	5.39972e-09
LUAD	0.324613	7.42103e-14		BRCA	0.180571	7.40466e-08		LUAD	0.177893	0.000212719
LGG	-0.224558	4.3446e-07		HNSC	0.148556	0.0016553		STAD	0.20404	0.000285809
LUSC	0.192139	2.08258e-05		PAAD	0.323758	0.00222094		LUSC	0.132487	0.00581765
STAD	0.188776	0.000132528		KICH	0.366378	0.00368405		PAAD	0.212151	0.0115521
COAD	-0.210854	0.000390996		KIRC	0.141185	0.00903669		ACC	0.286761	0.0139054
PAAD	0.256653	0.00244388		LUSC	0.145823	0.0164927		COAD	-0.15346	0.018577
THYM	0.320057	0.00312609		OV	-0.165241	0.0302943		UCEC	0.102688	0.0772444
LIHC	0.136158	0.0100061		LUAD	0.129332	0.0589151		LIHC	0.099978	0.0773719
PRAD	0.109521	0.0180298		CESC	-0.305603	0.0837168		SKCM	0.0836838	0.0980326
BLCA	0.0941213	0.0581119		STAD	0.104649	0.112682		CESC	-0.284557	0.10287
SARC	-0.12304	0.0607712		LIHC	-0.168545	0.160006		OV	-0.0813825	0.16691
KIRC	0.10222	0.0620367		COAD	-0.0971104	0.211859		TGCT	0.100372	0.221668
CESC	-0.110416	0.0626687		SKCM	0.0848484	0.219677		PRAD	0.0626864	0.240095
UCS	-0.245787	0.0655348		UCEC	0.116132	0.24989		ESCA	0.0842144	0.299082
KIRP	-0.0943574	0.115137		ACC	0.131792	0.273265		BLCA	0.0814326	0.333618
CHOL	0.265266	0.123436		CHOL	0.180175	0.293013		READ	-0.069097	0.522378
LAML	-0.132999	0.208831		TGCT	-0.0753494	0.371102		HNSC	0.0245949	0.585134
READ	-0.128778	0.223338		BLCA	-0.0607722	0.480527		THCA	0.0282174	0.700687
KICH	0.152797	0.223732		LAML	-0.126229	0.617708		KICH	0.0495318	0.70223
OV	-0.0665094	0.334899		GBM	-0.0284472	0.764866		GBM	0.019694	0.807213
THCA	-0.04816	0.352997		ESCA	-0.0235277	0.776534		CHOL	-0.0282443	0.876012
TGCT	0.0786056	0.369835		THCA	-0.0230372	0.796319		LAML	0.010653	0.929739
MESO	0.0823759	0.46967		KIRP	-0.000863024	0.993097		KIRP	-0.001177	0.984961
GBM	-0.0517032	0.530746						KIRC	0.000611834	0.990122
HNSC	-0.0265983	0.554131
ACC	-0.068298	0.556953
ESCA	-0.0330601	0.65833
PCPG	0.038427	0.659343
UCEC	-0.0218184	0.681183
UVM	0.0285917	0.803393
DLBC	0.0367473	0.828725
SKCM	-0.00789406	0.865479
MATH vs. PhyloWGS				MATH vs. ABSOLUTE
Cancer type	ρ	P		Cancer type	ρ	P
LUSC	0.483654	4.63923e-17		COAD	0.657521	3.20951e-43
LUAD	0.497704	1.14245e-14		LUAD	0.55981	2.00816e-36
BRCA	0.2256	1.03031e-10		LUSC	0.530355	4.66276e-32
HNSC	0.291366	3.71527e-10		BRCA	0.388093	6.6308e-32
LGG	0.247743	2.93178e-08		STAD	0.53242	4.0802e-25
STAD	0.330313	1.35517e-07		HNSC	0.445566	6.94594e-25
SKCM	0.346898	2.84893e-07		UCEC	0.475379	5.32073e-24
BLCA	0.350483	2.50596e-05		BLCA	0.582788	1.81213e-14
PRAD	0.317649	3.04307e-05		READ	0.588805	6.36408e-13
KIRC	0.212282	0.000202227		LIHC	0.293388	1.72606e-07
SARC	0.235933	0.000379811		SKCM	0.223559	8.52491e-06
THCA	0.327418	0.000576468		LGG	0.19106	0.000103088
UVM	0.408434	0.00145817		GBM	0.192679	0.000260378
TGCT	0.265284	0.00219657		PAAD	0.311515	0.000277021
THYM	0.336476	0.00243001		KIRC	0.209728	0.000827591
PAAD	0.320957	0.00416927		UCS	0.430319	0.00104098
CHOL	0.439599	0.00823465		THCA	0.219561	0.00657121
CESC	0.4443	0.00958774		KIRP	0.166266	0.00830543
LIHC	0.299021	0.0113054		CESC	0.37457	0.0290683
ACC	0.258737	0.0221779		UVM	0.25423	0.049976
LAML	0.648485	0.0490426		KICH	-0.247735	0.0522163
KIRP	0.187738	0.0601063		SARC	0.131315	0.095785
UCS	0.252927	0.0976233		ESCA	0.128752	0.111523
PCPG	0.14687	0.114069		PRAD	0.0697345	0.193077
COAD	0.111026	0.149477		OV	0.0595272	0.230806
ESCA	0.116279	0.159313		DLBC	0.191659	0.262803
UCEC	-0.0919162	0.368037		PCPG	0.106962	0.279822
OV	0.068166	0.372864		LAML	0.141344	0.29876
MESO	0.0824571	0.472938		TGCT	0.0847846	0.341334
GBM	0.0557406	0.547102		ACC	0.0616245	0.584709
KICH	0.0518996	0.691197		CHOL	-0.00219941	0.991209
DLBC	-0.0293978	0.862719
PhyloWGS vs. ABSOLUTE
Cancer type	ρ	P
BRCA	0.36375	7.40262e-29
LUAD	0.644413	1.67372e-26
HNSC	0.432619	4.37783e-21
STAD	0.529102	5.27848e-19
LGG	0.386659	4.17342e-16
OV	0.567752	2.72021e-15
KIRC	0.461084	5.50415e-15
LUSC	0.469826	5.63915e-14
BLCA	0.540269	7.96612e-12
ACC	0.504395	1.35462e-06
THCA	0.336225	0.000104361
CESC	0.597924	0.000238133
LIHC	0.413033	0.000848866
COAD	0.190633	0.012507
PAAD	0.258687	0.0250286
UVM	0.25688	0.049529
PRAD	0.145653	0.0603619
SKCM	0.12748	0.0881241
PCPG	0.116437	0.175422
KICH	0.170007	0.190235
LAML	0.407076	0.214024
GBM	0.106807	0.245605
TGCT	0.0896713	0.295595
KIRP	0.101696	0.324171
DLBC	0.163728	0.340005
UCS	0.143542	0.352595
CHOL	0.133504	0.45889
UCEC	-0.0605774	0.549368
SARC	0.0356075	0.658995
ESCA	0.0313598	0.725287
